# Supplementary material for: Formation of ammonium in saline solution treated by nanosecond pulsed cold atmospheric microplasma: a route to fast inactivation of E. coli bacteria
Source: Royal Society of Chemistry journal article supplement (doi:10.1039/c5ra01109d), 2015-01-01
Supplement: c5ra01109d1.pdf [file c5ra01109d1.pdf]

## Electronic supplementary information

### Formation of ammonium in saline solution treated by nanosecond pulsed cold atmospheric microplasma: a way to fast inactivation of *E. coli* bacteria

Simon Maheux, David Duday\*, Thierry Belmonte, Christian Penny, Henry-Michel Cauchie, Franck Clément, Patrick Choquet

#### Methods

##### *E. coli* Suspension Preparation and Analyses

*E. coli* strain CIP 53.126 was grown to the exponential phase for 2 h in liquid Tryptone Soya Broth at 37°C. The cells were then washed three times by centrifugation at 3000 g for 3 min and resuspended in PBS solution (Sigma-Aldrich, St. Louis, MO, USA, NaCl 138 mM, KCl 2.7 mM, phosphate buffer 10 mM, pH 7.4), before cellular density was adjusted to  $5 \times 10^7$  CFU.mL<sup>-1</sup>.

Wet chemistry treatments were performed by exposing for 35 minutes the *E. coli* suspensions described above to the following chemicals: 500 μM NH<sub>4</sub>Cl (Sigma-Aldrich, St. Louis, MO, USA), 500 μM NO<sub>2</sub><sup>-</sup> (Merck, Darmstadt, Germany), 4.52 / 45.2 / 452 μM HClO (Hach Lange, Düsseldorf, Germany) and 0.485 / 4.85 mM H<sub>2</sub>O<sub>2</sub> (Merck, Darmstadt, Germany); as well as the following chemical mixtures: 4.52 / 45.2 / 452 μM HClO + NH<sub>4</sub>Cl (NH<sub>4</sub>Cl added in a 5:1 molar ratio compared to HClO), 452 μM HClO + 500 μM NO<sub>2</sub><sup>-</sup> and 485 μM H<sub>2</sub>O<sub>2</sub> + 500 μM NO<sub>2</sub><sup>-</sup>. During all treatments, suspensions were maintained at pH 7.4.

*E. coli* culturability after 30 min wet chemistry treatments and 90 s.mL<sup>-1</sup> plasma treatments was assessed according to a plate counting method, right after treatment, after three days (plasma treated suspensions only) and after ten days post-treatment (plasma treated suspensions only). Briefly, treated suspensions underwent seven successive ten-fold dilutions in PBS before 100 μL of each were spread on Trypticase Soy Agar growth medium. Colony forming units were counted after overnight incubation at 37°C.

##### ICP-MS Analyses

5 mL high purity milliQ water samples were treated for 10 minutes (i.e. 120 s.mL<sup>-1</sup>) with He, He + 0.50% N<sub>2</sub> and He + 0.50% O<sub>2</sub> plasmas, then acidified with nitric acid (nitric acid for trace analysis min. 67 %, LGC Standards, Molsheim, France). They were then analysed by inductively coupled plasma mass spectrometry (ICP-MS) performed on an Elan DRC-e (PerkinElmer, Waltham, MA, USA). Calibration was done using Ge as internal standard (PlasmaCAL calibration standard for ICP-AES & ICP-MS, SCP Science, Courtaboeuf, France).

##### TOF-SIMS Analyses

Silicon wafers were treated for 60 minutes with He, He + 0.50% N<sub>2</sub> and He + 0.50% O<sub>2</sub> plasmas before being analysed. Time of Flight Secondary Ion Mass Spectroscopy (TOF-SIMS) analyses were then performed on a TOF-SIMS 5 (IonTOF, Münster, Germany) equipped with a Bi<sup>3+</sup> source. The applied intensity was 0.37 pA, with a primary ion dose density of  $1.0 \times 10^{11}$  ions.cm<sup>-2</sup>. 500 × 500 μm regions of interest on Si wafers were scanned with a resolution of 256 × 256 pixels.

##### Temperature and pH Analyses

Temperature and pH of treated and non-treated 0.9% saline and PBS samples were measured on an Orion 261S meter coupled to an Orion 9109WP triode (Thermo Fischer Scientific, Sunnyvale, CA, USA). Three-point calibration (pH buffers 4.00, 7.00 and 10.01) and subsequent measurements were carried out under magnetic stirring.

##### Ion Chromatography Analyses

Treated and non-treated high purity milliQ water samples were analysed by ion chromatography performed on a Dionex ICS-5000+ HPIC (Thermo Fischer Scientific, Sunnyvale, CA, USA). Anions (nitrates, nitrites and chlorites / chlorates) were separated with

IonPac AG18 and AS18 columns (eluent: 22 mM KOH, 0.25 mL.min<sup>-1</sup> flow rate), cations (ammonium) with IonPac CG16 and CS16 columns (eluent: 40 mM methanesulfonic acid, 0.40 mL.min<sup>-1</sup> flow rate).

### Colorimetry Analyses

Hydrogen peroxide concentration in treated 0.9% saline and PBS samples was quantified by a Spectroquant Hydrogen Peroxide Test (Merck, Darmstadt, Germany) colorimetric assay, based on the reduction of Cu(II) ions to Cu(I) ions. Absorption was measured at a wavelength of 445 nm, against a blank solution, on a Lambda 950 UV/vis/NIR spectrophotometer (PerkinElmer, Waltham, MA, USA).

### Figures

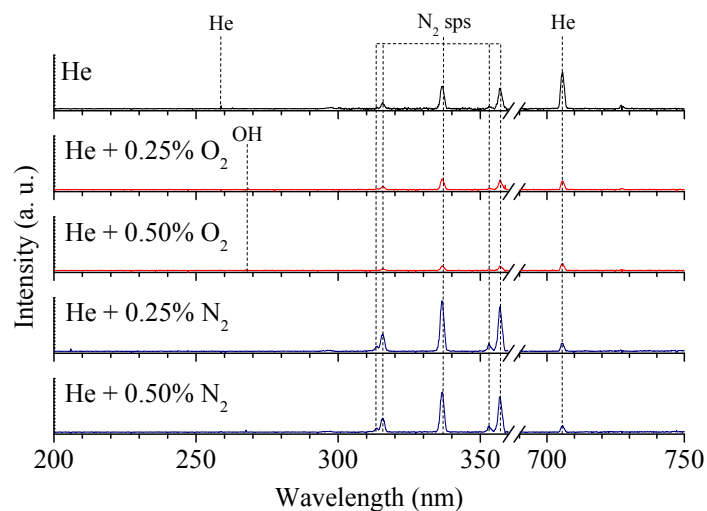

**Fig. S1** Optical emission spectra of He, He / O<sub>2</sub> and He / N<sub>2</sub> nanosecond pulsed microplasmas in the 200 – 350 nm UV range.

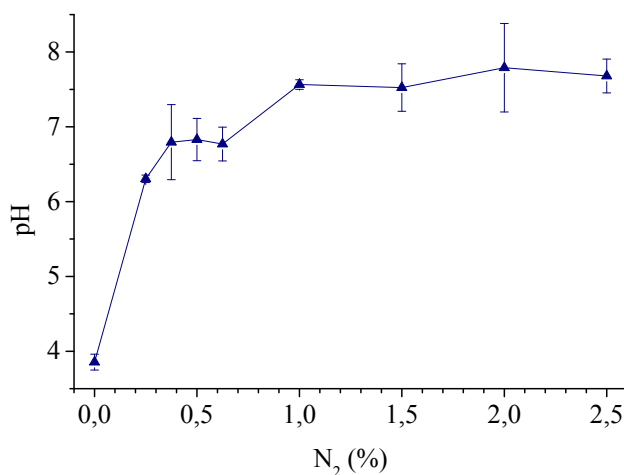

**Fig. S2** pH of 0.9% saline solutions after 90 s.mL<sup>-1</sup> He / N<sub>2</sub> nanosecond pulsed microplasma treatments with 0 – 2.5 vol. % N<sub>2</sub> mixed to He carrier gas (n = 3).

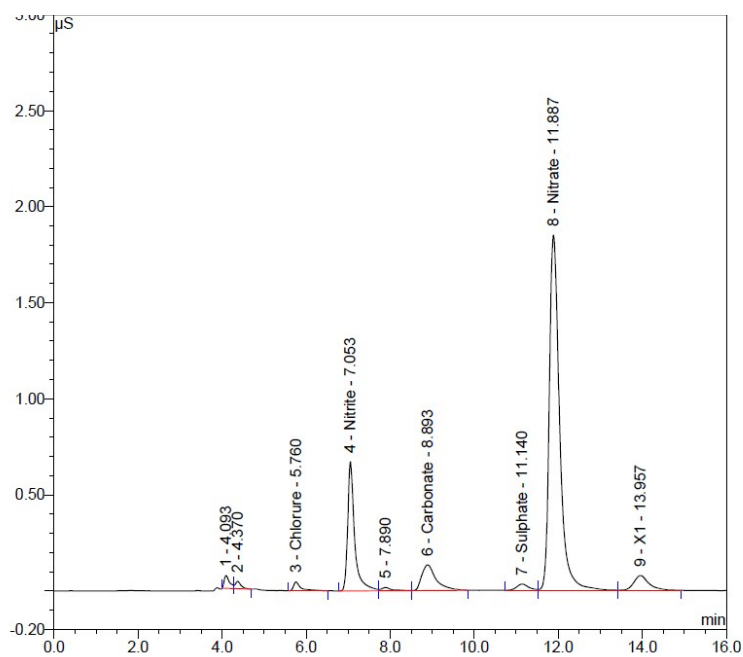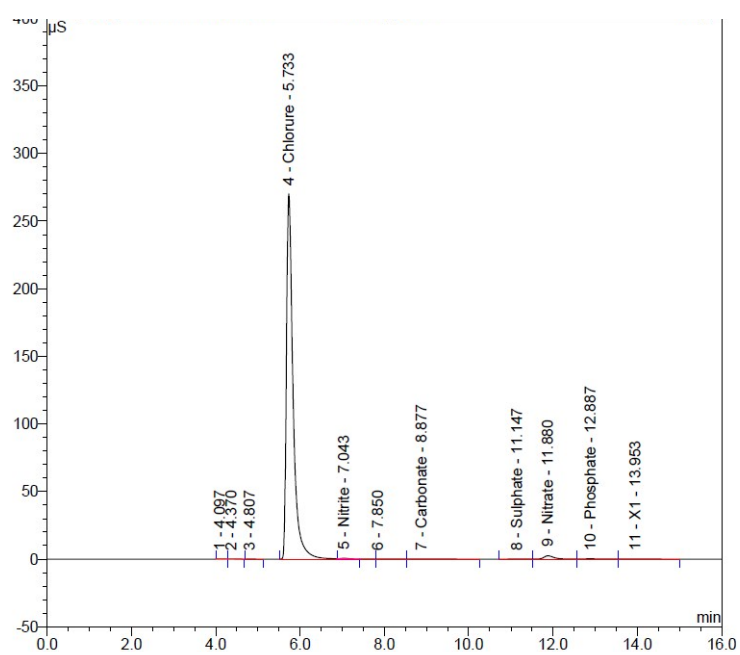

**Fig. S3** Anion chromatogram of milliQ water (top) and 0.015% saline (bottom) samples after 90 s.mL<sup>-1</sup> He + 0.50% N<sub>2</sub> nanosecond pulsed microplasma treatments. X1 elution peaks at 13.953 – 13.957 min are attributed to ClO<sub>3</sub><sup>-</sup> species.
